# Supplementary figures and images for: GenGIS: A geospatial information system for genomic data
Source: HighWire-hosted journal article supplement (doi:10.1101/gr.095612.109), 2009-07-27

**A**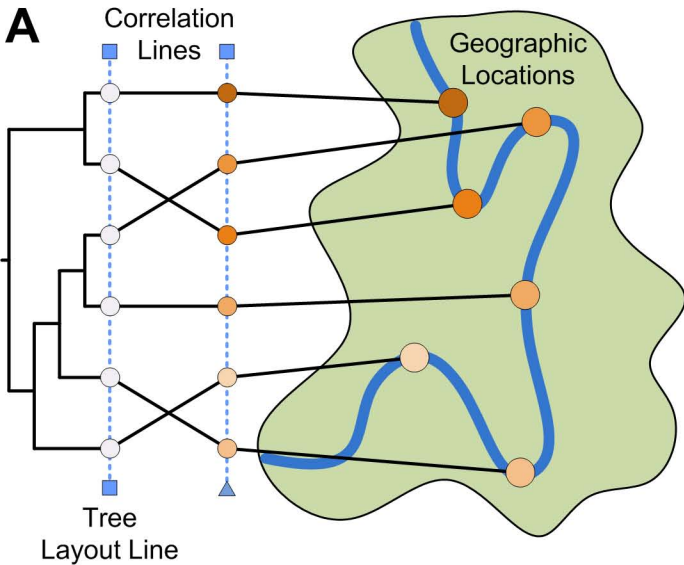**B**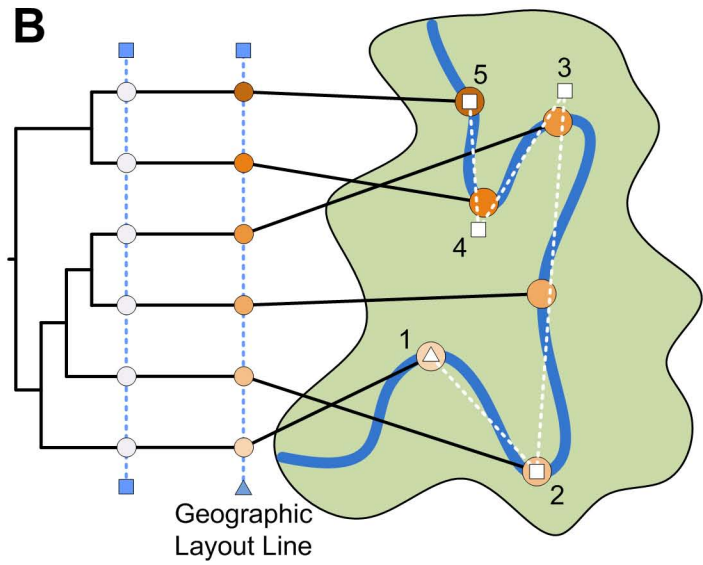

Supplement: Fig1.pdf [file Fig1.pdf]
